# Supplementary material
Source: Springer Nature journal article supplement (https://www.springermedizin.de/resource/supplementary/13019_2009_183_MOESM3_ESM.pdf/9638018)

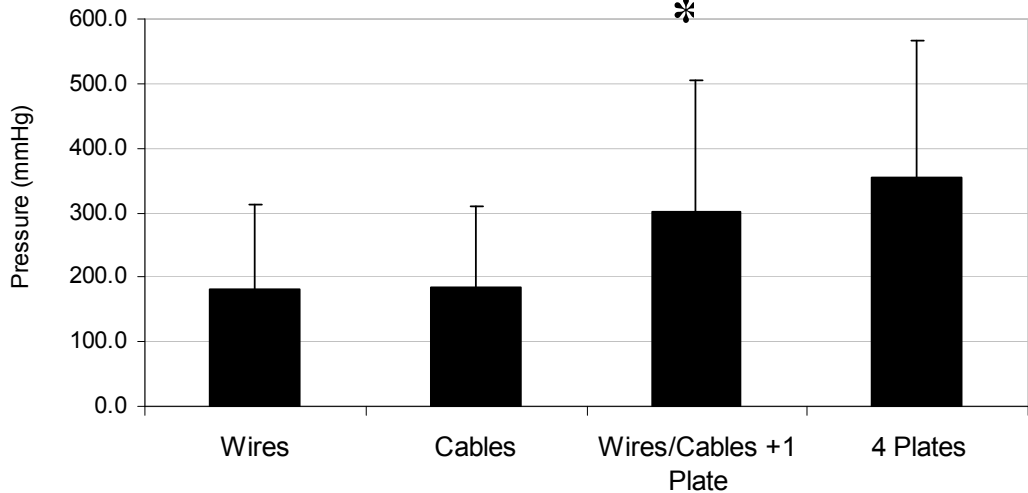

\*  $p \leq 0.05$  compared to wires/cables alone.

Supplement: MOESM3 [file 9638018]
